# Supplementary material for: New Score for Predicting Results after Catheter Ablation for Atrial Fibrillation: VAT-DHF
Source: MDPI journal article supplement (doi:10.3390/jcm13010061), 2023-12-22
Supplement: s1 [file s1]

Supplementary data:

Kaplan Meier survival-without-recurrence curves (Figures S1–S5) for each of the five variables

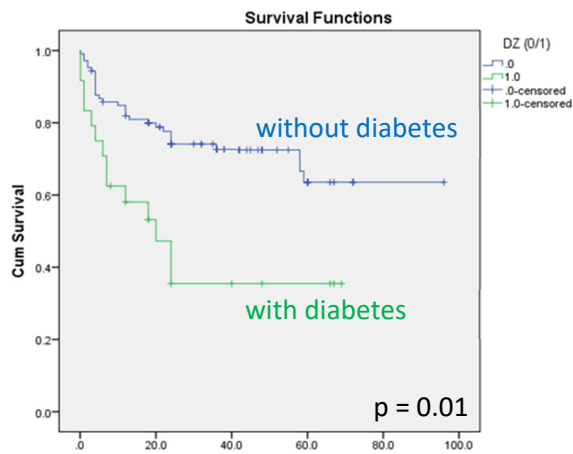

Figure S1. Kaplan Meier for DM (green) vs without it (blue) (green).

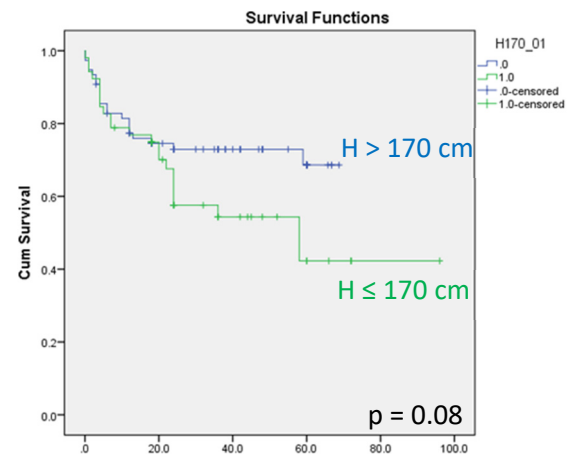

Figure S2. Kaplan Meier for height > 170cm (blue) vs < 170cm (green).

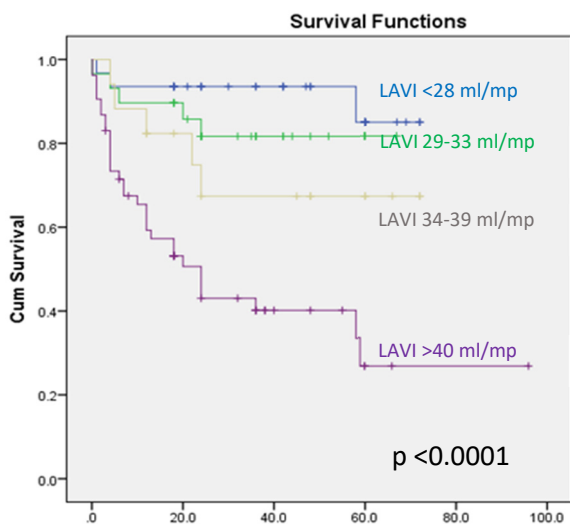

Figure S3. Kaplan Meier for different categories of LAVI (Vol-AS = left atrial volume indexed)

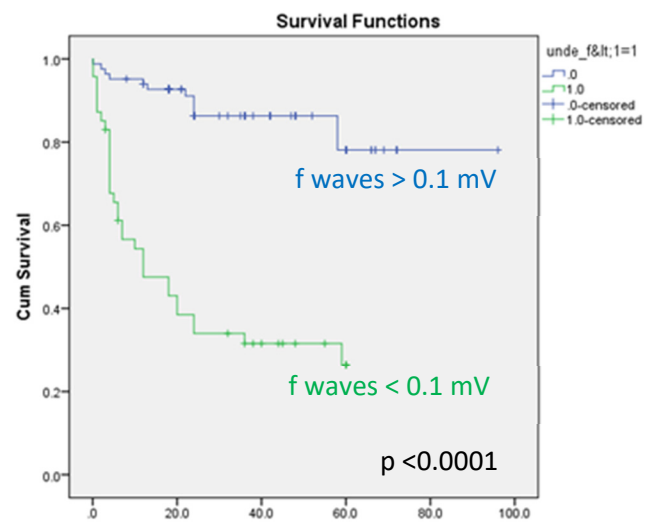

Figure S4. Kaplan Meier for f waves small (green) vs large (blue).

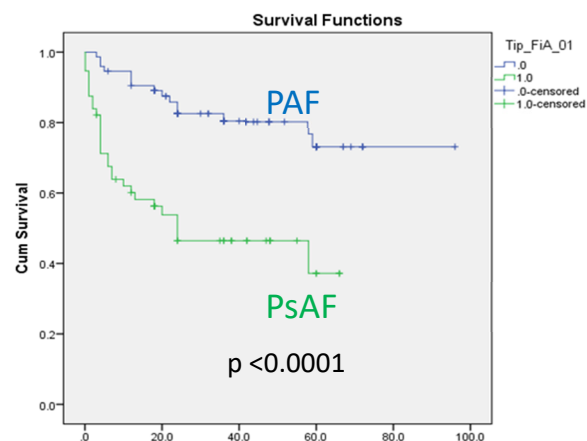

Figure S5: Kaplan Meier paroxysmal AF (blue) vs persistent AF (green)

The cutoff value is 5.875 as shown in the right part of the table below (VAT-DIF is the abbreviation in romanian for VAT-DHF)

| Coordinates of the Curve             |             |                 | Coordinates of the Curve           |             |                 |
|--------------------------------------|-------------|-----------------|------------------------------------|-------------|-----------------|
| Test Result Variable(s): CHADS-VASC2 |             |                 | Test Result Variable(s): VAT-DIF   |             |                 |
| Positive if Less Than or Equal To*   | Sensitivity | 1 - Specificity | Positive if Less Than or Equal To* | Sensitivity | 1 - Specificity |
| -1.000                               | .000        | .000            | -1.0000                            | .000        | .000            |
| .500                                 | .327        | .181            | .5000                              | .129        | .000            |
| 1.500                                | .639        | .398            | 1.1250                             | .271        | .045            |
| 2.500                                | .864        | .627            | 1.6250                             | .341        | .045            |
| 3.500                                | .946        | .831            | 2.1250                             | .376        | .045            |
| 4.500                                | .966        | .940            | 2.3750                             | .424        | .045            |
| 5.500                                | .993        | .940            | 2.7500                             | .435        | .045            |
| 6.500                                | 1.000       | .988            | 3.1250                             | .447        | .045            |
| 8.000                                | 1.000       | 1.000           | 3.3750                             | .529        | .045            |
|                                      |             |                 | 3.6250                             | .576        | .091            |
|                                      |             |                 | 3.8750                             | .635        | .136            |
|                                      |             |                 | 4.1250                             | .647        | .136            |
|                                      |             |                 | 4.3750                             | .682        | .159            |
|                                      |             |                 | 4.6250                             | .718        | .159            |
|                                      |             |                 | 5.0000                             | .753        | .159            |
|                                      |             |                 | 5.3750                             | .776        | .205            |
|                                      |             |                 | 5.6250                             | .800        | .205            |
|                                      |             |                 | 5.8750                             | .871        | .250            |
|                                      |             |                 | 6.1250                             | .871        | .273            |
|                                      |             |                 | 6.3750                             | .882        | .295            |
|                                      |             |                 | 6.6250                             | .906        | .318            |
|                                      |             |                 | 7.0000                             | .929        | .432            |
|                                      |             |                 | 7.3750                             | .929        | .455            |
|                                      |             |                 | 7.6250                             | .929        | .500            |
|                                      |             |                 | 8.2500                             | .953        | .568            |
|                                      |             |                 | 9.2500                             | .988        | .659            |
|                                      |             |                 | 10.2500                            | 1.000       | .909            |
|                                      |             |                 | 11.7500                            | 1.000       | 1.000           |

| Coordinates of the Curve           |             |                 |
|------------------------------------|-------------|-----------------|
| Test Result Variable(s): APPLE     |             |                 |
| Positive if Less Than or Equal To* | Sensitivity | 1 - Specificity |
| -1.00                              | .000        | .000            |
| .50                                | .500        | .143            |
| 1.50                               | .750        | .381            |
| 2.50                               | .932        | .571            |
| 3.50                               | 1.000       | .810            |
| 4.50                               | 1.000       | .952            |
| 6.00                               | 1.000       | 1.000           |
